# Supplementary material
Source: PubMed Central journal article supplement (PMC5523811)
Supplement: NIHMS846751-supplement-supplemental.pdf [file NIHMS846751-supplement-supplemental.pdf]

**Table S1. Microarray Analysis of Rap1-WT versus Rap1-KO White Adipose Tissue, Related to Results**

Analysis revealed 118 deregulated genes. For each genotype, three mice were analyzed. The table shows the list of differentially expressed genes. Ranking is by p Value.

| Gene Symbol   | logFC [WT vs KO] | t Value | p Value |
|---------------|------------------|---------|---------|
| Terf2ip       | -0.93009         | -4.0099 | 0.00606 |
| Mapk12        | -0.75110         | -3.8999 | 0.00692 |
| Fam63b        | 0.74167          | 3.7802  | 0.00801 |
| Raly          | -0.72633         | -3.7551 | 0.00826 |
| Hmgcs2        | -0.58801         | -3.7347 | 0.00847 |
| Id1           | -0.80697         | -3.6954 | 0.00890 |
| Dennd5b       | -0.54040         | -3.5652 | 0.01048 |
| Fam53b        | 0.52287          | 3.5637  | 0.01050 |
| Bhlhb9        | -0.58515         | -3.5016 | 0.01137 |
| Dock9         | -0.60167         | -3.4619 | 0.01196 |
| Nr4a1         | -0.57139         | -3.4573 | 0.01203 |
| Ifit2         | -0.63751         | -3.4510 | 0.01213 |
| Mafb          | -0.97356         | -3.3986 | 0.01298 |
| Ifit1         | -0.72589         | -3.3834 | 0.01323 |
| Fam217b       | 0.60909          | 3.3801  | 0.01329 |
| Mal2          | 0.63019          | 3.3403  | 0.01399 |
| Amot          | -0.56250         | -3.3339 | 0.01411 |
| B230214O09Rik | -0.64306         | -3.3245 | 0.01428 |
| Postn         | -0.77287         | -3.2639 | 0.01546 |
| Tstd3         | 0.62569          | 3.2576  | 0.01559 |
| Sc4mol        | 0.61626          | 3.1615  | 0.01770 |
| Fst           | -0.79022         | -3.1492 | 0.01799 |
| Enpp2         | -0.47443         | -3.1485 | 0.01801 |

|               |          |         |         |
|---------------|----------|---------|---------|
| Rgmb          | -0.46898 | -3.1247 | 0.01859 |
| Alas1         | 0.66434  | 3.0891  | 0.01949 |
| Numb          | -0.46980 | -3.0850 | 0.01960 |
| Syn2          | 0.47054  | 3.0679  | 0.02005 |
| Gpr160        | -0.51373 | -3.0482 | 0.02059 |
| Tpst1         | -0.77637 | -3.0417 | 0.02077 |
| Simc1         | -0.45830 | -3.0315 | 0.02106 |
| Klhl24        | -0.43996 | -3.0204 | 0.02137 |
| Hes1          | -0.40597 | -3.0109 | 0.02165 |
| Anks1         | 0.49298  | 3.0046  | 0.02183 |
| Dcun1d5       | -0.49679 | -2.9971 | 0.02206 |
| Lama2         | -1.05910 | -2.9872 | 0.02235 |
| Setd5         | -0.53591 | -2.9547 | 0.02336 |
| Enpp3         | -0.59154 | -2.9536 | 0.02339 |
| St3gal6       | -0.86604 | -2.9412 | 0.02379 |
| Clk2          | -0.44891 | -2.9166 | 0.02460 |
| Memo1         | 0.43634  | 2.9061  | 0.02495 |
| 3110045C21Rik | 0.44758  | 2.9005  | 0.02514 |
| Psmc8         | -0.77659 | -2.8919 | 0.02544 |
| Atp10d        | -0.52159 | -2.8885 | 0.02556 |
| Tmem86a       | -0.75045 | -2.8702 | 0.02620 |
| Mid1ip1       | 0.81477  | 2.8629  | 0.02646 |
| Usp18         | -0.68447 | -2.8433 | 0.02718 |
| Pydc4         | -0.46191 | -2.8388 | 0.02735 |
| Icam2         | -0.59665 | -2.8143 | 0.02829 |
| Cyp51         | 0.72924  | 2.8031  | 0.02872 |
| P2ry14        | -0.59779 | -2.7990 | 0.02889 |

|               |          |         |         |
|---------------|----------|---------|---------|
| Bclaf1        | -0.50821 | -2.7938 | 0.02909 |
| 4930445K14Rik | -0.42289 | -2.7912 | 0.02920 |
| AA407331      | -0.43503 | -2.7763 | 0.02980 |
| Pafah1b1      | -0.44926 | -2.7731 | 0.02994 |
| Taf13         | 0.36342  | 2.7683  | 0.03013 |
| Clk1          | -0.64631 | -2.7671 | 0.03018 |
| Ahctf1        | -0.47829 | -2.7549 | 0.03070 |
| Pdgfra        | -1.07283 | -2.7450 | 0.03112 |
| Kpna1         | 0.42141  | 2.7422  | 0.03124 |
| A030001D16Rik | 0.54739  | 2.7364  | 0.03149 |
| Myh10         | -0.39114 | -2.7336 | 0.03161 |
| Vav3          | -0.53335 | -2.7231 | 0.03207 |
| Efcab14       | -0.46119 | -2.7225 | 0.03210 |
| 1810010H24Rik | -0.42608 | -2.7145 | 0.03246 |
| Ces1f         | -0.63053 | -2.7039 | 0.03294 |
| Acaa1b        | -0.63956 | -2.7003 | 0.03310 |
| Kctd12        | -0.75684 | -2.6961 | 0.03329 |
| A530020G20Rik | -0.55624 | -2.6829 | 0.03391 |
| Hsd17b7       | 0.62855  | 2.6712  | 0.03447 |
| 9130004J05Rik | -0.39400 | -2.6700 | 0.03452 |
| Rps6kb1       | -0.51596 | -2.6566 | 0.03517 |
| Trav9d-3      | -0.82703 | -2.6555 | 0.03523 |
| Sparcl1       | -0.62877 | -2.6526 | 0.03537 |
| Prrc2c        | -0.47020 | -2.6522 | 0.03539 |
| Mmp2          | -1.22833 | -2.6502 | 0.03549 |
| Hs6st2        | -0.79398 | -2.6492 | 0.03553 |
| Irf7          | -0.47938 | -2.6442 | 0.03578 |

|            |          |         |         |
|------------|----------|---------|---------|
| Ifit3      | -0.82707 | -2.6252 | 0.03674 |
| Tnxb       | -0.98296 | -2.6224 | 0.03689 |
| Dennd4a    | 0.46222  | 2.6044  | 0.03782 |
| Pyhin1     | -0.67904 | -2.5987 | 0.03812 |
| Sh2b3      | -0.52124 | -2.5965 | 0.03824 |
| Oaf        | -0.47821 | -2.5929 | 0.03844 |
| Nrbf2      | 0.43941  | 2.5807  | 0.03910 |
| St6galnac4 | -0.38926 | -2.5805 | 0.03911 |
| Ogt        | -0.39209 | -2.5605 | 0.04022 |
| Dpp7       | -0.36337 | -2.5440 | 0.04116 |
| Ilf3       | -0.40414 | -2.5245 | 0.04230 |
| Rtp4       | -0.78424 | -2.5205 | 0.04254 |
| Akap8l     | -0.43925 | -2.5196 | 0.04259 |
| Ttc30a1    | 0.43645  | 2.5189  | 0.04263 |
| Ednrb      | -0.84907 | -2.5164 | 0.04278 |
| March7     | -0.46942 | -2.5114 | 0.04308 |
| Kdm3a      | -0.33842 | -2.5097 | 0.04319 |
| Zscan26    | -0.42964 | -2.5050 | 0.04347 |
| Snrnp48    | -0.45363 | -2.5046 | 0.04350 |
| Frmd4a     | -0.57246 | -2.5046 | 0.04350 |
| Pde4b      | -0.66520 | -2.4961 | 0.04402 |
| Grtp1      | 0.51350  | 2.4872  | 0.04457 |
| Ap2b1      | -0.57384 | -2.4828 | 0.04485 |
| Actn4      | -0.39663 | -2.4819 | 0.04491 |
| Sox18      | -0.49705 | -2.4785 | 0.04512 |
| Nrcam      | -0.42692 | -2.4772 | 0.04521 |
| Gbp6       | -0.37907 | -2.4744 | 0.04538 |

|               |          |         |         |
|---------------|----------|---------|---------|
| Idi1          | 0.78439  | 2.4742  | 0.04540 |
| Tmem140       | -0.44286 | -2.4721 | 0.04553 |
| Leo1          | 0.52365  | 2.4707  | 0.04562 |
| Arpc3         | -0.42771 | -2.4649 | 0.04599 |
| 1500012F01Rik | -0.37308 | -2.4506 | 0.04693 |
| Xaf1          | -0.46399 | -2.4363 | 0.04789 |
| Smyd1         | -0.99178 | -2.4344 | 0.04801 |
| Ntn4          | -0.57687 | -2.4324 | 0.04815 |
| Megf9         | 0.51605  | 2.4280  | 0.04845 |
| Tm4sf1        | -0.43267 | -2.4207 | 0.04895 |
| Klf4          | -0.92237 | -2.4152 | 0.04933 |
| Rbm47         | 0.44231  | 2.4149  | 0.04935 |
| Sept4         | -0.49214 | -2.4118 | 0.04957 |
| Dpm1          | 0.46628  | 2.4087  | 0.04979 |

**Table S2. Gene Ontology of Differentially Expressed Genes in Wild-Type versus Knockout Rap1 White Adipose Tissue, Related to Results**

The top 10 gene ontologies by adjusted p-value (FDR) are listed below.

| Gene Ontology Name                                | # Genes in Overlap | FDR      | Description                                                                                                                                                                                             |
|---------------------------------------------------|--------------------|----------|---------------------------------------------------------------------------------------------------------------------------------------------------------------------------------------------------------|
| Negative Regulation of Cellular Metabolic Process | 8                  | 2.11E-05 | Any process that stops, prevents or reduces the frequency, rate or extent of the chemical reactions and pathways by which individual cells transform chemical substances.                               |
| Negative Regulation of Metabolic Process          | 8                  | 2.11E-05 | Any process that stops, prevents or reduces the frequency, rate or extent of the chemical reactions and pathways within a cell or an organism.                                                          |
| Negative Regulation of Nucleic Acid Metabolism    | 7                  | 5.71E-05 | Any process that stops, prevents or reduces the frequency, rate or extent of the chemical reactions and pathways involving nucleobases, nucleosides, nucleotides and nucleic acids.                     |
| Regulation of Nucleic Acid Metabolism             | 10                 | 6.62E-05 | Any process that modulates the frequency, rate or extent of the chemical reactions and pathways involving nucleobases, nucleosides, nucleotides and nucleic acids.                                      |
| Regulation of Cellular Metabolic Process          | 11                 | 6.62E-05 | Any process that modulates the frequency, rate or extent of the chemical reactions and pathways by which individual cells transform chemical substances.                                                |
| Regulation of Metabolic Process                   | 11                 | 6.62E-05 | Any process that modulates the frequency, rate or extent of the chemical reactions and pathways within a cell or an organism.                                                                           |
| Negative Regulation of Cellular Process           | 10                 | 6.79E-05 | Any process that stops, prevents or reduces the frequency, rate or extent of cellular processes, those that are carried out at the cellular level, but are not necessarily restricted to a single cell. |
| Negative Regulation of Biological Process         | 10                 | 9.07E-05 | Any process that stops, prevents or reduces the frequency, rate or extent of a biological process.                                                                                                      |
| Negative Regulation of Transcription              | 6                  | 1.83E-04 | Any process that stops, prevents or reduces the frequency, rate or extent of transcription.                                                                                                             |
| System Development                                | 10                 | 6.09E-04 | The process whose specific outcome is the progression of an organismal system over time, from its formation to the mature structure                                                                     |

**Table S3. Gene Set Enrichment Analysis of Differentially Expressed Genes in Wild-Type versus Knockout Rap1 White Adipose Tissue, Related to Results**

The top 10 gene sets by adjusted p-value (FDR) are listed below.

| Pathway / Gene Set                   | Collection | # Genes in Overlap | FDR      | Description                                           |
|--------------------------------------|------------|--------------------|----------|-------------------------------------------------------|
| Interferon Signaling                 | Reactome   | 8                  | 1.50E-06 | Genes involved in Interferon Signaling                |
| Interferon Alpha Beta Signaling      | Reactome   | 6                  | 2.34E-06 | Genes involved in Interferon alpha/beta signaling     |
| Cytokine Signaling in Immune System  | Reactome   | 8                  | 3.12E-05 | Genes involved in Cytokine Signaling in Immune system |
| Developmental Biology                | Reactome   | 9                  | 3.26E-05 | Genes involved in Developmental Biology               |
| Immune System                        | Reactome   | 12                 | 8.37E-05 | Genes involved in Immune System                       |
| Axon Guidance                        | Reactome   | 6                  | 2.54E-03 | Genes involved in Axon guidance                       |
| Focal Adhesion                       | KEGG       | 5                  | 1.02E-02 | Focal adhesion                                        |
| Regulation of Actin Cytoskeleton     | KEGG       | 5                  | 1.25E-02 | Regulation of actin cytoskeleton                      |
| Leukocyte Transendothelial Migration | KEGG       | 4                  | 1.42E-02 | Leukocyte transendothelial migration                  |
| ATF2 Pathway                         | PID        | 3                  | 3.15E-02 | ATF-2 transcription factor network                    |

**Table S4. Microarray Analysis of Rap1-KO versus Rap1-WT Liver Tissue, Related to Results**

Analysis revealed 62 deregulated genes. For each genotype, three mice were analyzed. The table shows the list of differentially expressed genes. Ranking is by p Value.

| Gene Symbol  | logFC[WT vs KO] | t Value | P Value  | FDR       |
|--------------|-----------------|---------|----------|-----------|
| Hsd3b5       | 2.1322          | 9.4781  | 5.38E-19 | 3.326E-15 |
| Serpina12    | 1.6147          | 7.9591  | 2.85E-14 | 8.818E-11 |
| Mt2          | -1.5532         | -7.5885 | 3.38E-13 | 6.964E-10 |
| Chka         | -1.2626         | -6.4922 | 3.13E-10 | 4.713E-07 |
| Mt1          | -1.2912         | -6.4585 | 3.81E-10 | 4.713E-07 |
| Serpina4-ps1 | 1.6926          | 6.3467  | 7.31E-10 | 7.531E-07 |
| Creld2       | 1.1558          | 5.6542  | 3.41E-08 | 3.009E-05 |
| Egfr         | 1.0750          | 5.5839  | 4.94E-08 | 3.817E-05 |
| Rgs16        | 1.1849          | 5.5578  | 5.66E-08 | 3.888E-05 |
| Arrdc3       | 1.0549          | 5.3940  | 1.32E-07 | 8.168E-05 |
| Cyp2b10      | -1.0241         | -5.2138 | 3.28E-07 | 1.844E-04 |
| Mup10        | 0.9839          | 5.0945  | 5.91E-07 | 3.046E-04 |
| Id1          | -0.9466         | -4.7881 | 2.55E-06 | 1.214E-03 |
| Elovl6       | 0.9102          | 4.7265  | 3.40E-06 | 1.456E-03 |
| Lpl          | -1.0131         | -4.7178 | 3.53E-06 | 1.456E-03 |
| Slc22a7      | 0.8989          | 4.6658  | 4.48E-06 | 1.733E-03 |
| Gsta2        | -0.9298         | -4.6073 | 5.85E-06 | 2.009E-03 |
| Agxt2l1      | -0.8932         | -4.6072 | 5.85E-06 | 2.009E-03 |
| Mid1         | -0.8355         | -4.3242 | 2.03E-05 | 6.615E-03 |
| Ero1b        | 0.8267          | 4.2660  | 2.61E-05 | 8.058E-03 |
| Sdf2l1       | 0.8355          | 4.2212  | 3.15E-05 | 9.271E-03 |
| Nipal1       | -0.8116         | -4.1981 | 3.47E-05 | 9.754E-03 |



|          |         |         |             |           |
|----------|---------|---------|-------------|-----------|
| Esm1     | -0.8333 | -4.1573 | 4.11E-05    | 1.093E-02 |
| Egr1     | -0.9205 | -4.1499 | 4.24E-05    | 1.093E-02 |
| Hspa1b   | 0.7957  | 4.1138  | 4.93E-05    | 1.218E-02 |
| Nnmt     | -0.7931 | -4.0377 | 6.72E-05    | 1.599E-02 |
| Klf10    | 0.7880  | 4.0184  | 7.27E-05    | 1.665E-02 |
| Angptl4  | 0.7880  | 3.9536  | 9.43E-05    | 2.083E-02 |
| Mmd2     | -0.8070 | -3.9149 | 0.000110012 | 2.266E-02 |
| Slco1a1  | 0.7870  | 3.9126  | 0.000111014 | 2.266E-02 |
| Aacs     | 0.7445  | 3.9068  | 0.000113619 | 2.266E-02 |
| Terf2ip  | -0.7365 | -3.8642 | 0.000134346 | 2.595E-02 |
| Cyp7a1   | -0.8243 | -3.8482 | 0.000143009 | 2.633E-02 |
| Cyp7b1   | 0.7579  | 3.8400  | 0.00014767  | 2.633E-02 |
| Hyou1    | 0.7582  | 3.8375  | 0.000149088 | 2.633E-02 |
| Ugt2b37  | 0.7293  | 3.7799  | 0.000186316 | 3.151E-02 |
| Lepr     | -0.7280 | -3.7768 | 0.000188568 | 3.151E-02 |
| Elovl3   | 0.7495  | 3.7229  | 0.000231744 | 3.770E-02 |
| Id2      | -0.7677 | -3.7137 | 0.000239925 | 3.803E-02 |
| Ppargc1a | -0.7158 | -3.6806 | 0.000271909 | 4.202E-02 |
| Cyp2b13  | -0.8034 | -3.6077 | 0.000357023 | 5.383E-02 |
| Vldlr    | -0.6976 | -3.5928 | 0.000377239 | 5.553E-02 |
| Cyp3a16  | 0.7437  | 3.5056  | 0.000518949 | 7.461E-02 |
| Sult5a1  | 0.6750  | 3.4823  | 0.000564581 | 7.932E-02 |
| Vnn1     | 0.7384  | 3.4555  | 0.000621457 | 8.537E-02 |
| Skil     | -0.6697 | -3.4465 | 0.000641739 | 8.624E-02 |
| Gas2     | -0.6580 | -3.4109 | 0.000728292 | 9.579E-02 |
| Sdc1     | -0.6534 | -3.3754 | 0.000825547 | 1.063E-01 |
| Id3      | -0.7032 | -3.3691 | 0.000843915 | 1.065E-01 |

|               |         |         |             |           |
|---------------|---------|---------|-------------|-----------|
| Dio1          | 0.6524  | 3.3607  | 0.000869201 | 1.075E-01 |
| Cyp2d9        | 0.7033  | 3.3314  | 0.000962601 | 1.167E-01 |
| Dbp           | 0.8196  | 3.3237  | 0.000988618 | 1.175E-01 |
| Hao2          | -0.7095 | -3.2980 | 0.001080454 | 1.260E-01 |
| Nucb2         | 0.6328  | 3.2849  | 0.001130413 | 1.294E-01 |
| 9030619P08Rik | 0.6377  | 3.2741  | 0.001172967 | 1.318E-01 |
| Got1          | -0.6318 | -3.2615 | 0.001224608 | 1.352E-01 |
| Aldh1b1       | -0.6276 | -3.2299 | 0.001363727 | 1.479E-01 |
| Cyp3a44       | 0.6247  | 3.1929  | 0.001544967 | 1.647E-01 |
| Rsad2         | -0.6076 | -3.1800 | 0.0016132   | 1.674E-01 |
| Ptbp1         | 0.6155  | 3.1780  | 0.001624262 | 1.674E-01 |
| Prom1         | -0.6348 | -3.1272 | 0.001923001 | 1.949E-01 |
| Fabp5         | 0.6093  | 3.1192  | 0.001974347 | 1.969E-01 |

**Table S5. Gene Ontology of Differentially Expressed Genes in Wild-Type versus Knockout Rap1 Liver, Related to Results**  
The top 10 gene ontologies by adjusted p-value (FDR) are listed below.

| Gene Ontology Name                                                                            | # Genes in Overlap | FDR      | Description                                                                                                                                                                                 |
|-----------------------------------------------------------------------------------------------|--------------------|----------|---------------------------------------------------------------------------------------------------------------------------------------------------------------------------------------------|
| Nucleobase, Nucleoside, Nucleotide, and Nucleic Acid Metabolic Process                        | 11                 | 2.57E-05 | The chemical reactions and pathways involving nucleobases, nucleosides, nucleotides and nucleic acids.                                                                                      |
| Regulation of Cellular Metabolic Process                                                      | 9                  | 2.57E-05 | Any process that modulates the frequency, rate or extent of the chemical reactions and pathways by which individual cells transform chemical substances.                                    |
| Regulation of Metabolic Process                                                               | 9                  | 2.57E-05 | Any process that modulates the frequency, rate or extent of the chemical reactions and pathways within a cell or an organism.                                                               |
| Regulation of Nucleobase, Nucleoside, Nucleotide, and Nucleic Acid Metabolic Process          | 8                  | 3.78E-05 | Any process that modulates the frequency, rate or extent of the chemical reactions and pathways involving nucleobases, nucleosides, nucleotides and nucleic acids.                          |
| Negative Regulation of Transcription Factor Activity                                          | 3                  | 7.17E-05 | Any process that stops, prevents, or reduces the frequency, rate or extent of the activity of a transcription factor, any factor involved in the initiation or regulation of transcription. |
| Negative Regulation of DNA Binding                                                            | 3                  | 8.36E-05 | Any process that stops, prevents. or reduces the frequency, rate or extent of DNA binding, selective interaction with deoxyribonucleic acid.                                                |
| Negative Regulation of Binding                                                                | 3                  | 8.36E-05 | Any process that stops or reduces the rate or extent of binding, the selective interaction of a molecule with one or more specific sites on another molecule.                               |
| Transcription                                                                                 | 8                  | 8.36E-05 | The synthesis of either RNA on a template of DNA or DNA on a template of RNA.                                                                                                               |
| Lipid Metabolic Process                                                                       | 6                  | 8.53E-05 | The chemical reactions and pathways involving lipids, compounds soluble in an organic solvent but not, or sparingly, in an aqueous solvent.                                                 |
| Negative Regulation of Nucleobase, Nucleoside, Nucleotide, and Nucleic Acid Metabolic Process | 5                  | 1.97E-04 | Any process that stops, prevents, or reduces the frequency, rate or extent of the chemical reactions and pathways involving nucleobases, nucleosides, nucleotides and nucleic acids.        |

**Table S6. Gene Set Enrichment Analysis of Differentially Expressed Genes in Wild-Type versus Knockout Rap1 Liver, Related to Results**

The top 10 gene sets by adjusted p-value (FDR) are listed below.

| Pathway / Gene Set                                              | Collection | # Genes in Overlap | FDR      | Description                                                                     |
|-----------------------------------------------------------------|------------|--------------------|----------|---------------------------------------------------------------------------------|
| Metabolism of Lipids and Lipoproteins                           | Reactome   | 9                  | 1.22E-06 | Genes involved in Metabolism of lipids and lipoproteins                         |
| PPAR Signaling Pathway                                          | KEGG       | 4                  | 2.80E-04 | PPAR signaling pathway                                                          |
| REACTOME_ Fatty Acid Triacylglycerol and Ketone Body Metabolism | Reactome   | 5                  | 2.80E-04 | Genes involved in Fatty acid, triacylglycerol, and ketone body metabolism       |
| Biological Oxidations                                           | Reactome   | 4                  | 3.30E-03 | Genes involved in Biological oxidations                                         |
| Circadian Clock                                                 | Reactome   | 3                  | 4.69E-03 | Genes involved in Circadian Clock                                               |
| Transcriptional Regulation of White Adipocyte Differentiation   | Reactome   | 3                  | 9.82E-03 | Genes involved in Transcriptional Regulation of White Adipocyte Differentiation |
| Synthesis of Very Long Chain Fatty Acyl-CoAs                    | Reactome   | 2                  | 1.16E-02 | Genes involved in Synthesis of very long-chain fatty acyl-CoAs                  |
| TGF-beta Signaling Pathway                                      | KEGG       | 3                  | 1.16E-02 | TGF-beta signaling pathway                                                      |
| Endogenous Sterols                                              | Reactome   | 2                  | 1.16E-02 | Genes involved in Endogenous sterols                                            |
| Primary Bile Acid Biosynthesis                                  | Reactome   | 2                  | 1.16E-02 | Genes involved in Integrin cell surface interactions                            |

**Table S7. Microarray Analysis of [Rap1-WT versus Rap1-KO] and [Rap1-WT versus Rap1-Mutant] Mouse Embryonic Fibroblasts, Related to Results**

Analysis revealed 187 deregulated genes. For each genotype, three mice were analyzed. The table shows the list of differentially expressed genes. Ranking is by p Value. Differentially expressed genes that are bound by Rap1 based on the ChIP-seq data are marked as well as if the ChIP-binding site contains a TTAGGG motif. In addition, differentially expressed genes that are not fully or partially rescued by expression of Rap1 $\Delta$ TRF2 are marked.

| Gene Symbol | logFC (WT vs KO) | t Value | P Value   | Rap1 Bound | TTAGGG |
|-------------|------------------|---------|-----------|------------|--------|
| Col3a1      | 3.3086           | 5.6872  | 1.374E-04 |            |        |
| Col5a2      | 2.7193           | 4.1305  | 1.648E-03 | ✓          |        |
| Prss35      | 1.5021           | 4.0537  | 1.879E-03 | ✓          | ✓      |
| Aspn        | 2.0758           | 3.8789  | 2.538E-03 | ✓          | ✓      |
| Adamts12    | 1.7769           | 3.7954  | 2.933E-03 |            |        |
| Slc7a5      | 1.5469           | 3.7563  | 3.140E-03 |            |        |
| Prss23      | 2.1896           | 3.7017  | 3.454E-03 | ✓          |        |
| Col4a2      | 1.4512           | 3.6539  | 3.756E-03 |            |        |
| Col5a1      | 2.3214           | 3.5401  | 4.588E-03 |            |        |
| Bmp4        | 1.7372           | 3.5224  | 4.733E-03 |            |        |
| Tgfb2       | 1.6195           | 3.4154  | 5.719E-03 |            |        |
| Pycr1       | 1.5418           | 3.4137  | 5.736E-03 |            |        |
| Fndc1       | 1.7392           | 3.3767  | 6.125E-03 |            |        |
| Htra1       | 2.3720           | 3.3648  | 6.256E-03 |            |        |
| Nid2        | 1.7873           | 3.3622  | 6.285E-03 |            |        |
| Col1a1      | 2.8724           | 3.3244  | 6.721E-03 |            |        |
| Pappa       | 1.5212           | 3.3046  | 6.963E-03 |            |        |
| Pck2        | 1.8683           | 3.2705  | 7.398E-03 |            |        |
| Jag1        | 1.1582           | 3.1419  | 9.307E-03 | ✓          | ✓      |
| Pdgfrl      | 1.4010           | 3.1278  | 9.546E-03 |            |        |

| logFC [WT vs Mut] | Not Rescued |
|-------------------|-------------|
| 0.0887            |             |
| 0.5272            |             |
| 0.0823            |             |
| -0.3687           |             |
| -0.0822           |             |
| 0.7915            |             |
| 0.2723            |             |
| 0.1380            |             |
| 0.7517            |             |
| 0.5091            |             |
| -0.0699           |             |
| 0.7539            |             |
| -0.1901           |             |
| 1.2930            |             |
| 0.7114            |             |
| 0.8146            |             |
| -0.3061           |             |
| 1.2682            |             |
| -0.2725           |             |
| 0.6602            |             |

|           |         |         |           |   |   |
|-----------|---------|---------|-----------|---|---|
| Aldh1l2   | 2.2664  | 3.1170  | 9.732E-03 | ✓ | ✓ |
| Serpinb6b | 1.4600  | 3.0912  | 1.019E-02 | ✓ |   |
| Ifit3     | 1.8372  | 3.0882  | 1.025E-02 |   |   |
| Fbn1      | 2.3845  | 3.0823  | 1.035E-02 |   |   |
| Cdkn1c    | 1.7914  | 3.0572  | 1.083E-02 |   |   |
| Gm22      | 1.1863  | 3.0456  | 1.106E-02 |   |   |
| Asns      | 1.8418  | 3.0454  | 1.106E-02 |   |   |
| H19       | 2.7181  | 3.0431  | 1.111E-02 |   |   |
| Mreg      | -1.6876 | -3.0421 | 1.113E-02 | ✓ | ✓ |
| Gm9706    | 1.2664  | 3.0337  | 1.130E-02 |   |   |
| Nrn1      | -1.3744 | -2.9930 | 1.215E-02 |   |   |
| Trib3     | 1.4191  | 2.9901  | 1.221E-02 |   |   |
| Mx1       | 1.2787  | 2.9882  | 1.226E-02 |   |   |
| Ccdc80    | 1.6501  | 2.9695  | 1.267E-02 |   |   |
| Abcb1a    | -1.0785 | -2.9575 | 1.295E-02 | ✓ |   |
| Ctla2a    | 1.1572  | 2.9493  | 1.314E-02 |   |   |
| Cthrc1    | 2.5856  | 2.9404  | 1.336E-02 |   |   |
| Gclc      | -1.7501 | -2.9385 | 1.340E-02 |   |   |
| Adamts1   | 1.7944  | 2.9297  | 1.361E-02 | ✓ |   |
| Adamts5   | 2.0679  | 2.9085  | 1.414E-02 |   |   |
| Adamts4   | 1.1856  | 2.8795  | 1.489E-02 |   |   |
| Rspo3     | 2.0068  | 2.8585  | 1.547E-02 | ✓ |   |
| Pxdn      | 1.5100  | 2.8423  | 1.592E-02 |   |   |
| Wisp1     | 2.0515  | 2.8406  | 1.597E-02 | ✓ |   |
| Moxd1     | 1.4768  | 2.8311  | 1.625E-02 |   |   |
| Actg2     | 1.8323  | 2.8284  | 1.633E-02 |   |   |
| Boc       | 1.0348  | 2.8062  | 1.699E-02 |   |   |

|         |   |
|---------|---|
| 2.5633  | ✓ |
| -0.3096 |   |
| -1.9287 |   |
| 0.4874  |   |
| -0.2032 |   |
| 0.2277  |   |
| 1.8136  | ✓ |
| 1.2497  |   |
| -1.1689 |   |
| -0.0157 |   |
| 0.3048  |   |
| 1.4610  | ✓ |
| -0.3557 |   |
| 0.0464  |   |
| -0.4264 |   |
| -0.5546 |   |
| 1.3169  |   |
| -0.8430 |   |
| 1.0879  |   |
| -0.0281 |   |
| 0.7987  |   |
| -0.2121 |   |
| 0.9245  |   |
| 0.3631  |   |
| -0.1166 |   |
| 0.6320  |   |
| 0.3645  |   |

|          |         |         |           |   |  |
|----------|---------|---------|-----------|---|--|
| Il8      | 2.0111  | 2.7981  | 1.724E-02 |   |  |
| Crispld2 | 0.9466  | 2.7979  | 1.724E-02 | ✓ |  |
| Arhgap6  | -1.0991 | -2.7959 | 1.731E-02 |   |  |
| Ifi27l2a | 1.6952  | 2.7956  | 1.732E-02 |   |  |
| Ifi44    | 1.6090  | 2.7855  | 1.763E-02 |   |  |
| P4ha1    | 1.6848  | 2.7840  | 1.768E-02 | ✓ |  |
| Pgm5     | 0.9257  | 2.7724  | 1.805E-02 |   |  |
| Tor3a    | 1.3108  | 2.7681  | 1.819E-02 |   |  |
| Cxcl2    | 1.9902  | 2.7629  | 1.836E-02 |   |  |
| Aldh18a1 | 2.1502  | 2.7571  | 1.855E-02 |   |  |
| Col4a5   | 1.2952  | 2.7461  | 1.892E-02 |   |  |
| Diras2   | 1.3334  | 2.7459  | 1.893E-02 |   |  |
| Slc1a6   | 1.5757  | 2.7415  | 1.908E-02 |   |  |
| Mfap5    | 1.4628  | 2.7275  | 1.956E-02 | ✓ |  |
| Npr3     | 1.1612  | 2.6960  | 2.070E-02 | ✓ |  |
| Matn2    | 1.7116  | 2.6902  | 2.092E-02 | ✓ |  |
| Crabp2   | 2.0081  | 2.6880  | 2.100E-02 |   |  |
| Spock3   | 1.3992  | 2.6769  | 2.142E-02 |   |  |
| Piezo2   | 0.9128  | 2.6602  | 2.207E-02 |   |  |
| Sertad4  | 1.6463  | 2.6601  | 2.208E-02 | ✓ |  |
| Col11a1  | 2.2862  | 2.6517  | 2.241E-02 |   |  |
| Col1a2   | 2.6931  | 2.6455  | 2.266E-02 | ✓ |  |
| Arsj     | 1.5750  | 2.6424  | 2.278E-02 | ✓ |  |
| Kcnma1   | 1.0406  | 2.6393  | 2.291E-02 |   |  |
| Sparc    | 1.5498  | 2.6379  | 2.297E-02 | ✓ |  |
| Kdelr3   | 1.8465  | 2.6373  | 2.299E-02 | ✓ |  |
| Lrrc17   | 1.8698  | 2.6248  | 2.351E-02 |   |  |

|         |   |
|---------|---|
| -0.3073 |   |
| 0.3180  |   |
| -0.2637 |   |
| -0.4010 |   |
| -0.7443 |   |
| 1.8964  | ✓ |
| -0.0903 |   |
| 0.0150  | ✓ |
| 2.5010  |   |
| 1.6404  |   |
| -0.2425 |   |
| 0.8146  |   |
| 0.2699  |   |
| 1.1999  |   |
| 1.1175  | ✓ |
| 1.2571  |   |
| 1.1900  |   |
| 0.0893  |   |
| -0.1406 |   |
| 0.6821  |   |
| 0.1036  |   |
| 0.5597  |   |
| 0.1177  |   |
| 0.0128  |   |
| 0.4328  |   |
| 1.5295  |   |
| 0.0179  |   |

|         |         |         |           |   |   |
|---------|---------|---------|-----------|---|---|
| Mei4    | 1.2568  | 2.6137  | 2.399E-02 |   |   |
| Nedd9   | 1.1532  | 2.6085  | 2.421E-02 | ✓ |   |
| Lbh     | 1.2679  | 2.5996  | 2.460E-02 | ✓ |   |
| Postn   | 3.2059  | 2.5954  | 2.478E-02 |   |   |
| Slc7a3  | 1.0788  | 2.5942  | 2.484E-02 |   |   |
| Hmcn1   | 1.1458  | 2.5912  | 2.497E-02 |   |   |
| Slc7a2  | -1.4652 | -2.5884 | 2.510E-02 |   |   |
| P4ha2   | 2.2520  | 2.5760  | 2.566E-02 |   |   |
| Myo7a   | 1.0028  | 2.5733  | 2.578E-02 |   |   |
| Scd2    | 1.7926  | 2.5722  | 2.583E-02 |   |   |
| Ncoa7   | 1.2422  | 2.5701  | 2.593E-02 |   |   |
| Id2     | -1.2548 | -2.5667 | 2.609E-02 |   | ✓ |
| Cyr61   | 2.0647  | 2.5654  | 2.615E-02 | ✓ |   |
| Col6a2  | 1.8228  | 2.5615  | 2.633E-02 | ✓ |   |
| Fzd2    | 1.6931  | 2.5559  | 2.659E-02 |   |   |
| Gbp7    | 0.9942  | 2.5532  | 2.673E-02 |   |   |
| Dusp6   | -1.0308 | -2.5473 | 2.701E-02 |   |   |
| Col4a1  | 1.0083  | 2.5444  | 2.715E-02 |   |   |
| Ly6a    | 1.4986  | 2.5403  | 2.734E-02 | ✓ |   |
| Plat    | 1.8975  | 2.5183  | 2.844E-02 |   |   |
| Gulp1   | 1.9521  | 2.5139  | 2.866E-02 | ✓ |   |
| Chac1   | 0.8576  | 2.5052  | 2.911E-02 | ✓ | ✓ |
| Olfml2b | 1.4561  | 2.5001  | 2.938E-02 |   |   |
| Psph    | 1.0863  | 2.4978  | 2.950E-02 |   |   |
| Col6a3  | 1.4045  | 2.4897  | 2.993E-02 |   |   |
| Col5a3  | 1.0566  | 2.4875  | 3.004E-02 |   |   |
| Igf2    | 2.4621  | 2.4850  | 3.018E-02 |   |   |

|         |   |
|---------|---|
| 0.6916  |   |
| 0.6429  |   |
| 1.2800  | ✓ |
| -1.2868 |   |
| 0.4923  |   |
| -0.3088 |   |
| -1.0415 |   |
| 2.4276  | ✓ |
| 0.4880  |   |
| 1.4322  |   |
| 0.7906  |   |
| -0.4003 | ✓ |
| 1.5036  |   |
| 0.4588  |   |
| 0.4879  |   |
| -0.9990 |   |
| -0.3356 |   |
| -0.1342 |   |
| 0.3889  |   |
| 1.5563  |   |
| 1.1076  |   |
| 1.0017  | ✓ |
| -0.3137 |   |
| 1.2024  | ✓ |
| 0.8723  |   |
| 0.3182  |   |
| -0.5922 |   |



|         |         |         |           |   |   |
|---------|---------|---------|-----------|---|---|
| Mthfd2  | 1.6072  | 2.4847  | 3.019E-02 |   |   |
| Agtr2   | 1.1509  | 2.4771  | 3.061E-02 |   |   |
| Tubb2b  | 2.0461  | 2.4715  | 3.091E-02 |   |   |
| Reck    | 1.0034  | 2.4710  | 3.094E-02 |   |   |
| Cela1   | -1.3810 | -2.4698 | 3.100E-02 |   |   |
| Fibin   | 1.2758  | 2.4655  | 3.124E-02 |   |   |
| Igsf3   | 1.3724  | 2.4640  | 3.133E-02 | ✓ |   |
| Cxcl3   | 1.7015  | 2.4607  | 3.151E-02 |   |   |
| Ifi47   | 1.2052  | 2.4587  | 3.162E-02 |   |   |
| Pdlim2  | 1.3829  | 2.4481  | 3.223E-02 | ✓ | ✓ |
| Itm2a   | 1.4033  | 2.4282  | 3.338E-02 |   |   |
| Pdgfd   | 1.8230  | 2.4226  | 3.372E-02 |   |   |
| Perp    | -1.8998 | -2.4194 | 3.391E-02 |   |   |
| Abi3bp  | 1.1379  | 2.4117  | 3.438E-02 |   |   |
| Glipr2  | 1.2576  | 2.4113  | 3.440E-02 | ✓ |   |
| Kcnj15  | 1.3368  | 2.4031  | 3.491E-02 |   |   |
| Adamts2 | 1.1752  | 2.3986  | 3.519E-02 |   |   |
| Lpp     | 1.2824  | 2.3976  | 3.525E-02 |   |   |
| Agrn    | 1.2321  | 2.3956  | 3.537E-02 |   |   |
| Lama4   | 1.5795  | 2.3934  | 3.552E-02 |   |   |
| Cxcl10  | 1.9461  | 2.3920  | 3.560E-02 |   |   |
| Col8a1  | 1.2692  | 2.3906  | 3.569E-02 |   |   |
| Nupr1   | 1.6348  | 2.3877  | 3.588E-02 |   |   |
| Tnc     | 2.0613  | 2.3819  | 3.625E-02 |   |   |
| Pkia    | 1.2808  | 2.3796  | 3.639E-02 |   |   |
| Wls     | 1.6031  | 2.3751  | 3.668E-02 |   |   |
| Fkbp7   | 1.3835  | 2.3732  | 3.681E-02 |   |   |

|         |   |
|---------|---|
| 1.9112  | ✓ |
| -0.2552 |   |
| 1.1009  |   |
| 0.5838  |   |
| -1.2274 |   |
| -0.1742 |   |
| 0.6867  |   |
| 0.3301  |   |
| -1.3054 |   |
| 0.4722  |   |
| 1.0620  |   |
| 0.9702  |   |
| -1.6443 |   |
| -1.0743 |   |
| 1.1670  | ✓ |
| -0.1447 |   |
| -0.1219 |   |
| 1.0388  |   |
| 0.4604  |   |
| 0.9943  |   |
| 1.0949  | ✓ |
| 1.2072  | ✓ |
| 1.6798  | ✓ |
| 2.2004  |   |
| 0.4269  |   |
| 0.5261  |   |
| 0.2661  |   |

|          |         |         |           |   |   |
|----------|---------|---------|-----------|---|---|
| Fam101b  | 1.2022  | 2.3730  | 3.682E-02 |   |   |
| Ttc39c   | -1.0269 | -2.3661 | 3.727E-02 |   |   |
| Plekha4  | 1.1088  | 2.3657  | 3.730E-02 |   |   |
| Adamts6  | 0.9736  | 2.3557  | 3.797E-02 | ✓ |   |
| Tmtc1    | 0.8054  | 2.3553  | 3.799E-02 |   |   |
| Vegfc    | 0.9649  | 2.3515  | 3.825E-02 |   |   |
| Ncam1    | 1.8308  | 2.3489  | 3.843E-02 |   |   |
| Prkcdbp  | 1.3863  | 2.3482  | 3.847E-02 |   |   |
| Kdm5b    | 0.8792  | 2.3468  | 3.857E-02 |   |   |
| Serpinb9 | 1.3580  | 2.3455  | 3.866E-02 |   |   |
| Tmeff1   | 1.4450  | 2.3420  | 3.890E-02 | ✓ |   |
| Sspn     | 1.4423  | 2.3375  | 3.921E-02 |   |   |
| lsg20    | 1.3752  | 2.3369  | 3.925E-02 |   |   |
| Specc1   | 1.4630  | 2.3367  | 3.926E-02 | ✓ |   |
| Slc35d1  | -1.2964 | -2.3325 | 3.956E-02 |   |   |
| Sema3e   | 1.5191  | 2.3299  | 3.974E-02 |   |   |
| Ephb2    | 1.0987  | 2.3283  | 3.985E-02 |   |   |
| Ogn      | 2.4014  | 2.3242  | 4.014E-02 |   |   |
| Glul     | -1.2858 | -2.3175 | 4.062E-02 |   |   |
| Dnmt3a   | 0.8292  | 2.3153  | 4.078E-02 | ✓ |   |
| Itgb1    | 1.0287  | 2.3121  | 4.101E-02 | ✓ |   |
| Selm     | 1.6085  | 2.3066  | 4.141E-02 | ✓ | ✓ |
| Sorcs2   | 1.0537  | 2.3022  | 4.173E-02 | ✓ |   |
| Igfbp6   | 1.0916  | 2.2996  | 4.192E-02 |   |   |
| Cercam   | 1.0091  | 2.2947  | 4.228E-02 |   |   |
| Cyb5r1   | 1.4119  | 2.2943  | 4.231E-02 |   |   |
| Bmp2     | -1.3995 | -2.2900 | 4.264E-02 |   |   |

|         |   |
|---------|---|
| 0.1224  |   |
| 0.1290  |   |
| -0.0650 |   |
| 0.4117  |   |
| -0.1263 |   |
| 0.3741  |   |
| 1.5725  |   |
| 0.9920  |   |
| 0.3094  |   |
| -0.7770 |   |
| 0.3584  |   |
| 0.4889  |   |
| 1.7070  | ✓ |
| 0.8466  |   |
| -1.3101 | ✓ |
| 0.7842  |   |
| 0.8166  |   |
| -1.1457 |   |
| -0.9354 |   |
| 0.0345  |   |
| 0.7020  |   |
| 0.6023  |   |
| 0.1693  |   |
| 0.8895  |   |
| 0.5367  |   |
| 1.3166  | ✓ |
| -0.5828 |   |

|          |         |         |           |   |   |
|----------|---------|---------|-----------|---|---|
| Xaf1     | 1.3675  | 2.2859  | 4.294E-02 |   |   |
| Tmem45a  | 1.9016  | 2.2839  | 4.309E-02 |   |   |
| Tmem243  | -1.6149 | -2.2754 | 4.374E-02 |   |   |
| Nov      | 1.9837  | 2.2697  | 4.419E-02 |   |   |
| Bcat1    | 1.5627  | 2.2669  | 4.441E-02 |   |   |
| Tgfr2    | 1.0093  | 2.2650  | 4.455E-02 | ✓ |   |
| Tfpi     | 0.9785  | 2.2646  | 4.459E-02 |   |   |
| Ddah2    | 1.2925  | 2.2644  | 4.460E-02 |   |   |
| Ppic     | 1.6199  | 2.2594  | 4.500E-02 |   |   |
| Fut11    | 0.7798  | 2.2498  | 4.576E-02 | ✓ |   |
| Fads3    | 1.3502  | 2.2436  | 4.626E-02 |   |   |
| Zfp521   | 1.5204  | 2.2426  | 4.635E-02 | ✓ |   |
| Maged2   | 1.2527  | 2.2405  | 4.652E-02 |   |   |
| Sephs2   | -1.6081 | -2.2306 | 4.733E-02 |   |   |
| Vcl      | 1.3216  | 2.2303  | 4.735E-02 | ✓ | ✓ |
| Herc6    | 0.9077  | 2.2299  | 4.739E-02 |   |   |
| Fkbp9    | 1.1539  | 2.2285  | 4.751E-02 |   |   |
| Speg     | 1.7534  | 2.2278  | 4.756E-02 |   |   |
| Cdon     | 1.4480  | 2.2273  | 4.760E-02 |   |   |
| Adm      | 1.8641  | 2.2270  | 4.763E-02 |   |   |
| Pfkfb3   | 1.3271  | 2.2242  | 4.786E-02 |   |   |
| Oasl2    | 1.5240  | 2.2233  | 4.794E-02 |   |   |
| Pfkl     | 1.1498  | 2.2217  | 4.807E-02 |   |   |
| Arhgap28 | 0.9962  | 2.2215  | 4.809E-02 | ✓ |   |
| Fam214a  | -1.0763 | -2.2176 | 4.842E-02 |   |   |
| Sulf1    | 1.9567  | 2.2133  | 4.879E-02 |   |   |
| Prkd1    | 1.7641  | 2.2131  | 4.880E-02 |   |   |

|         |   |
|---------|---|
| 0.0698  |   |
| 2.3809  | ✓ |
| -0.9490 |   |
| -0.0889 |   |
| 1.5836  | ✓ |
| 0.5834  |   |
| 0.7818  |   |
| 0.9085  |   |
| 1.0214  |   |
| 0.6015  |   |
| 1.3011  | ✓ |
| 0.0181  |   |
| 0.7351  |   |
| -1.3606 |   |
| 0.8131  |   |
| -0.6473 |   |
| 0.6583  |   |
| 1.4236  |   |
| 0.3428  |   |
| 2.7680  |   |
| 1.5937  |   |
| -0.8735 |   |
| 1.1194  | ✓ |
| 0.7080  |   |
| -1.1301 | ✓ |
| 0.8702  |   |
| 0.8893  |   |

|          |        |        |           |   |  |
|----------|--------|--------|-----------|---|--|
| App      | 1.2677 | 2.2128 | 4.883E-02 |   |  |
| Trim30a  | 1.1404 | 2.2069 | 4.933E-02 |   |  |
| Fam114a1 | 0.9465 | 2.2064 | 4.938E-02 |   |  |
| Edil3    | 1.4905 | 2.2018 | 4.978E-02 | ✓ |  |
| Lamc1    | 1.0830 | 2.2007 | 4.988E-02 | ✓ |  |

|         |  |
|---------|--|
| 0.2572  |  |
| -0.1960 |  |
| 0.3421  |  |
| 1.1540  |  |
| 0.5112  |  |

**Table S8. Gene Ontology of Differentially Expressed Genes in Wild-Type versus Knockout Rap1 MEFs, Related to Results**

The top 10 gene ontologies by adjusted p-value (FDR) are listed below.

| Gene Ontology Name                          | # Genes in Overlap | FDR      | Description                                                                                                                                                                                                                                                                      |
|---------------------------------------------|--------------------|----------|----------------------------------------------------------------------------------------------------------------------------------------------------------------------------------------------------------------------------------------------------------------------------------|
| Organ Development                           | 22                 | 9.16E-14 | Development of a tissue or tissues that work together to perform a specific function or functions. Development pertains to the process whose specific outcome is the progression of a structure over time, from its formation to the mature structure.                           |
| Anatomical Structure Development            | 27                 | 9.16E-14 | The biological process whose specific outcome is the progression of an anatomical structure from an initial condition to its mature state.                                                                                                                                       |
| Multicellular Organismal Development        | 25                 | 8.15E-12 | The biological process whose specific outcome is the progression of an organism over time from an initial condition (e.g. a zygote or a young adult) to a later condition (e.g. a multicellular animal or an aged adult).                                                        |
| System Development                          | 23                 | 8.15E-12 | The process whose specific outcome is the progression of an organismal system over time, from its formation to the mature structure.                                                                                                                                             |
| Skeletal Development                        | 9                  | 1.76E-08 | The process whose specific outcome is the progression of the skeleton over time, from its formation to the mature structure.                                                                                                                                                     |
| Amino Acid and Derivative Metabolic Process | 8                  | 3.62E-07 | The chemical reactions and pathways involving amino acids, organic acids containing one or more amino substituents, and compounds derived from amino acids.                                                                                                                      |
| Amino Acid Metabolic Process                | 7                  | 1.31E-06 | The chemical reactions and pathways involving amino acids, organic acids containing one or more amino substituents.                                                                                                                                                              |
| Negative Regulation of Biological Process   | 15                 | 1.69E-06 | Any process that stops, prevents, or reduces the frequency, rate or extent of a biological process. Biological processes are regulated by many means; examples include the control of gene expression, protein modification or interaction with a protein or substrate molecule. |
| Nitrogen Compound Biosynthetic Process      | 5                  | 2.46E-06 | The chemical reactions and pathways resulting in the formation of organic and inorganic nitrogenous compounds.                                                                                                                                                                   |
| Tissue Development                          | 8                  | 2.46E-06 | The process whose specific outcome is the progression of a tissue over time, from its formation to the mature structure.                                                                                                                                                         |

**Table S9. Gene Set Enrichment Analysis of Differentially Expressed Genes in Wild-Type versus Knockout Rap1 MEFs, Related to Results**

The top 10 gene sets by adjusted p-value (FDR) are listed below.

| Pathway / Gene Set                    | Collection | # Genes in Overlap | FDR      | Description                                             |
|---------------------------------------|------------|--------------------|----------|---------------------------------------------------------|
| Focal Adhesion                        | KEGG       | 18                 | 2.20E-14 | Focal adhesion                                          |
| Extracellular Matrix Organization     | Reactome   | 14                 | 2.41E-14 | Genes involved in Extracellular matrix organization     |
| ECM Receptor Interaction              | KEGG       | 15                 | 2.52E-14 | ECM-receptor interaction                                |
| Collagen Formation                    | Reactome   | 14                 | 3.55E-14 | Genes involved in Collagen formation                    |
| NCAM1 Interactions                    | Reactome   | 11                 | 4.11E-14 | Genes involved in NCAM1 interactions                    |
| NCAM Signaling for Neurite Out Growth | Reactome   | 11                 | 5.98E-14 | Genes involved in NCAM signaling for neurite out-growth |
| Signaling by PDGF                     | Reactome   | 13                 | 6.83E-14 | Genes involved in Signaling by PDGF                     |
| Axon Guidance                         | Reactome   | 14                 | 4.07E-11 | Genes involved in Axon guidance                         |
| Developmental Biology                 | Reactome   | 16                 | 9.70E-11 | Genes involved in Developmental Biology                 |
| Integrin Cell Surface Interactions    | Reactome   | 9                  | 1.01E-09 | Genes involved in Integrin cell surface interactions    |
